# Supplementary material
Source: MDPI journal article supplement (https://www.mdpi.com/2673-8007/4/1/32)
Supplement: s1 [file s1]

Supplementary Information to the following manuscript:

**Complementation of an *Escherichia coli* K-12 mutant strain deficient in KDO synthesis by forming D-arabinose 5-phosphate from glycolaldehyde with fructose 6-phosphate aldolase (FSA)**

Emma Guitart Font <sup>1</sup>, Georg A. Sprenger<sup>1,\*</sup>

<sup>1</sup> Institute of Microbiology, University of Stuttgart, Stuttgart, Germany

\* Correspondence: Georg.sprenger@imb.uni-stuttgart.de

**Table S1.** PCR primers.

| Name                            | Sequence (5'→ 3')                                                            |
|---------------------------------|------------------------------------------------------------------------------|
| kdsD-del5'                      | ATGTCGCACGTAGAGTTACAACCGGGTTTTGACTTTCAGCA<br><u>ATTGTGTAGGCTGGAGCTGCTTCG</u> |
| kdsD-del3'                      | CGCAGTAAATCATGCATATGTAACACACCGAGTAAATGGT<br><u>CATATGAATATCCTCCTTAGTTC</u>   |
| A <sub>r</sub> -rbsK-5' (EcoRI) | TTTT <u>GAAATTC</u> AATGCAGAACCTGTTGACCGCTCATC                               |
| A <sub>r</sub> -rbsK-3' (BstBI) | TTTTT <u>TTCGAATA</u> AAAATGCGCCACCGTGTTAGGGTG                               |
| C <sub>r</sub> -rbsK-5' (PstI)  | TTTT <u>CTGCAGTCA</u> ATAAAGATCGCTTCGTCAGTG                                  |

|                                                  |                                                                        |
|--------------------------------------------------|------------------------------------------------------------------------|
| CrbsK-3' (HindIII)                               | TTTT <u>AAGCTT</u> AATAAGATCGCTGTCGCCATCGAAC                           |
| IrPtac- <i>fsaA</i> <sup>A129S</sup> -5' (BstBI) | TTTTT <u>TCGAAT</u> TGGTATGGCTGTGCAGGTCGTAAATC                         |
| IrPtac- <i>fsaA</i> <sup>A129S</sup> -3' (PstI)  | TTTT <u>CTGCAGT</u> TTTATCAGACCGCTTCTGCGTTC                            |
| Universal pTarget                                | ACTAGTATTATACCTAGGACTGAGCTAGC                                          |
| rbsK (CRISPR)                                    | <u>GCTGCCATCACACTTTCGAGG</u> TTTTAGAGCTAGAAATAGC<br>AAGTTAAAATAAGGCTAG |
| Test-gutQ-5'                                     | TTCCAGCGTGAAACTATTCGTCAGG                                              |
| Test-gutQ-3'                                     | ATAAATTGTTTATGGGCACCGACGGC                                             |
| Test-kdsD-5'                                     | GCAATAGCGGGGGTTCGCAAAGG                                                |
| Test-kdsD-3'                                     | TGAGCGCACAAACGAATGCCATAACC                                             |

**Table S2.** Dose-response curve for various A5P concentrations, shake flask cultures, OD<sub>600 nm</sub> measured. Details for growth curves and media used are given in Materials and Methods. Two biological replicates of BW25113  $\Delta gutQ \Delta kdsD::kan$  at A5P concentrations 0  $\mu$ M, 5  $\mu$ M, 10  $\mu$ M, 25  $\mu$ M, 40  $\mu$ M, 50  $\mu$ M, 60  $\mu$ M, 70  $\mu$ M, and 100  $\mu$ M.

|                                        | [A5P] ( $\mu$ M) | Replicate | Time (h) |       |       |       |       |
|----------------------------------------|------------------|-----------|----------|-------|-------|-------|-------|
|                                        |                  |           | 0        | 4     | 8     | 24    | 48    |
| BW25113 $\Delta gutQ \Delta kdsD::kan$ | 0                | 1         | 0.046    | 0.079 | 0.054 | 0.082 | 0.031 |
|                                        |                  | 2         | 0.050    | 0.051 | 0.072 | 0.068 | 0.027 |
|                                        | 5                | 1         | 0.042    | 0.041 | 0.043 | 0.288 | 0.835 |
|                                        |                  | 2         | 0.048    | 0.054 | 0.057 | 0.046 | 0.902 |
|                                        | 10               | 1         | 0.045    | 0.043 | 0.040 | 0.436 | 1.206 |
|                                        |                  | 2         | 0.051    | 0.057 | 0.056 | 0.058 | 1.266 |
|                                        | 25               | 1         | 0.047    | 0.070 | 0.059 | 0.673 | 1.808 |
|                                        |                  | 2         | 0.051    | 0.044 | 0.081 | 1.129 | 1.742 |
|                                        | 40               | 1         | 0.045    | 0.045 | 0.047 | 0.058 | 2.916 |
|                                        |                  | 2         | 0.056    | 0.053 | 0.051 | 0.048 | 2.008 |
|                                        | 50               | 1         | 0.045    | 0.055 | 0.063 | 0.715 | 2.382 |
|                                        |                  | 2         | 0.051    | 0.044 | 0.088 | 0.649 | 2.464 |
|                                        | 60               | 1         | 0.045    | 0.048 | 0.045 | 0.046 | 3.113 |
|                                        |                  | 2         | 0.053    | 0.054 | 0.056 | 0.047 | 2.635 |
|                                        | 70               | 1         | 0.045    | 0.050 | 0.052 | 0.054 | 3.232 |
|                                        |                  | 2         | 0.058    | 0.050 | 0.056 | 0.052 | 2.463 |
|                                        | 100              | 1         | 0.049    | 0.050 | 0.063 | 0.088 | 2.532 |
|                                        |                  | 2         | 0.0531   | 0.05  | 0.066 | 0.119 | 2.949 |

Average OD<sub>600 nm</sub> values from two biological replicates (see above):

|                                        | [A5P] (μM) | Time (h) |       |       |       |       |
|----------------------------------------|------------|----------|-------|-------|-------|-------|
|                                        |            | 0        | 4     | 8     | 24    | 48    |
| <b>BW25113 <i>ΔgutQ ΔkdsD::kan</i></b> | <b>0</b>   | 0.048    | 0.065 | 0.063 | 0.075 | 0.029 |
|                                        | <b>5</b>   | 0.045    | 0.047 | 0.050 | 0.167 | 0.868 |
|                                        | <b>10</b>  | 0.048    | 0.050 | 0.048 | 0.247 | 1.236 |
|                                        | <b>25</b>  | 0.049    | 0.057 | 0.070 | 0.901 | 1.775 |
|                                        | <b>40</b>  | 0.051    | 0.049 | 0.049 | 0.053 | 2.462 |
|                                        | <b>50</b>  | 0.048    | 0.050 | 0.076 | 0.682 | 2.423 |
|                                        | <b>60</b>  | 0.049    | 0.051 | 0.050 | 0.047 | 2.874 |
|                                        | <b>70</b>  | 0.051    | 0.050 | 0.054 | 0.053 | 2.848 |
|                                        | <b>100</b> | 0.051    | 0.050 | 0.065 | 0.104 | 2.741 |

**Table S3.** Dose-response curve for various exogenous GoA concentrations, shake flask cultures, maximal OD<sub>600 nm</sub> measured. Details for growth and media used are given in Materials and Methods. Two biological replicates.

| GoA concentration (μM) | maximal OD <sub>600 nm</sub>                      |             |                                                                    |             |
|------------------------|---------------------------------------------------|-------------|--------------------------------------------------------------------|-------------|
|                        | BW25113 $\Delta gutQ \Delta kdsD::kan$ pJF119fsaA |             | BW25113 $\Delta gutQ \Delta kdsD::kan$ pJF119fsaA <sup>A129S</sup> |             |
|                        | Replicate 1                                       | Replicate 2 | Replicate 1                                                        | Replicate 2 |
| 0                      | 1.656                                             | 1.158       | 1.328                                                              | 1.19        |
| 10                     | 2.059                                             | 1.793       | 1.982                                                              | 1.86        |
| 25                     | 2.119                                             | 2.152       | 2.66                                                               | 2.621       |
| 40                     | 2.085                                             | 2.519       | 2.368                                                              | 2.781       |
| 50                     | 2.126                                             | 2.383       | 2.594                                                              | 2.622       |
| 90                     | 2.47                                              | 2.808       | 2.678                                                              | 3.212       |
| 100                    | 2.602                                             | 2.564       | 3.157                                                              | 3.088       |
| 125                    | 2.348                                             | 2.599       | 2.686                                                              | 3.495       |

| GoA concentration (μM) | maximal OD <sub>600 nm</sub>                           |             |                                                                                                     |             |
|------------------------|--------------------------------------------------------|-------------|-----------------------------------------------------------------------------------------------------|-------------|
|                        | BW25113 Δ <i>gutQ</i> Δ <i>kdsD</i> pJF119 <i>fsaB</i> |             | BW25113 Δ <i>gutQ</i> Δ <i>kdsD</i> Δ <i>rbsK</i> ::P <sub>tac</sub> - <i>fsaA</i> <sup>A129S</sup> |             |
|                        | Replicate 1                                            | Replicate 2 | Replicate 1                                                                                         | Replicate 2 |
| 0                      | 1.156                                                  | 1.177       | 1.238                                                                                               | 1.134       |
| 10                     | 1.774                                                  | 1.633       | 1.549                                                                                               | 1.584       |
| 25                     | 2.156                                                  | 1.998       | 1.808                                                                                               | 1.844       |
| 40                     | 2.152                                                  | 1.912       | 2.043                                                                                               | 1.903       |
| 50                     | 2.117                                                  | 2.033       | 1.936                                                                                               | 2.054       |
| 90                     | 2.16                                                   | 2.409       | 2.243                                                                                               | 2.233       |
| 100                    | 2.481                                                  | 2.34        | 2.253                                                                                               | 2.331       |
| 125                    | 2.656                                                  | 2.419       | 2.394                                                                                               | 2.381       |
| 150                    | 2.522                                                  | 2.533       | 2.485                                                                                               | 2.427       |
| 200                    | 2.614                                                  | 2.488       | 2.569                                                                                               | 2.597       |
| 300                    | 2.633                                                  | 2.933       | 2.695                                                                                               | 2.711       |
| 400                    | 2.776                                                  | 2.749       | 2.76                                                                                                | 2.832       |

**Figure S1.** Agarose gel electrophoresis. Verification of gene deletions by colony PCR detection to study presence or deletion of the *gutQ*, *kdsD* or *rbsK* genes in the chromosome of BW25113, BW25113  $\Delta gutQ \Delta kdsD$  and BW25113  $\Delta gutQ \Delta kdsD \Delta rbsK::P_{tac-fsaA^{A129S}}$ . For the confirmation of  $\Delta rbsK::P_{tac-fsaA^{A129S}}$  a subsequent restriction with *EcoRI* was also necessary. BW25113 was used as a control for the deletions and BW25113  $\Delta gutQ \Delta kdsD$  for the integration of  $P_{tac-fsaA^{A129S}}$  in the ribose operon.

**$\Delta gutQ$**

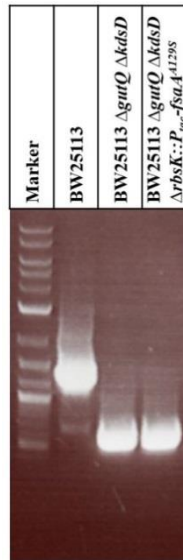

**$\Delta kdsD$**

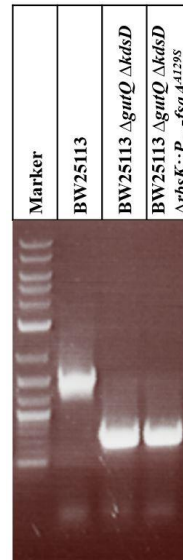

**$\Delta rbsK::P_{tac-fsaA^{A129S}}$**

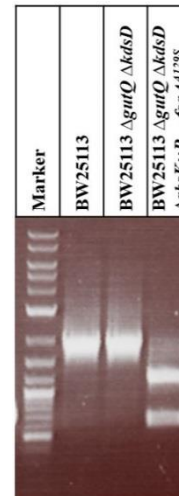

**Figure S2.** Light microscopy photos of cells of BW25113, BW25113  $\Delta gutQ \Delta kdsD::kan$  (left: in the absence of A5P, right: in the presence of 100  $\mu M$  A5P), or BW25113  $\Delta gutQ \Delta kdsD \Delta rbsK::P_{tac-fsaA}^{A129S}$  (left: in the absence of A5P; right: in the presence of 100  $\mu M$  GoA) after growth on MOPS-MM containing 28 mM glucose. BW25113  $\Delta gutQ \Delta kdsD \Delta rbsK::P_{tac-fsaA}^{A129S}$  was induced with 100  $\mu M$  IPTG during growth.

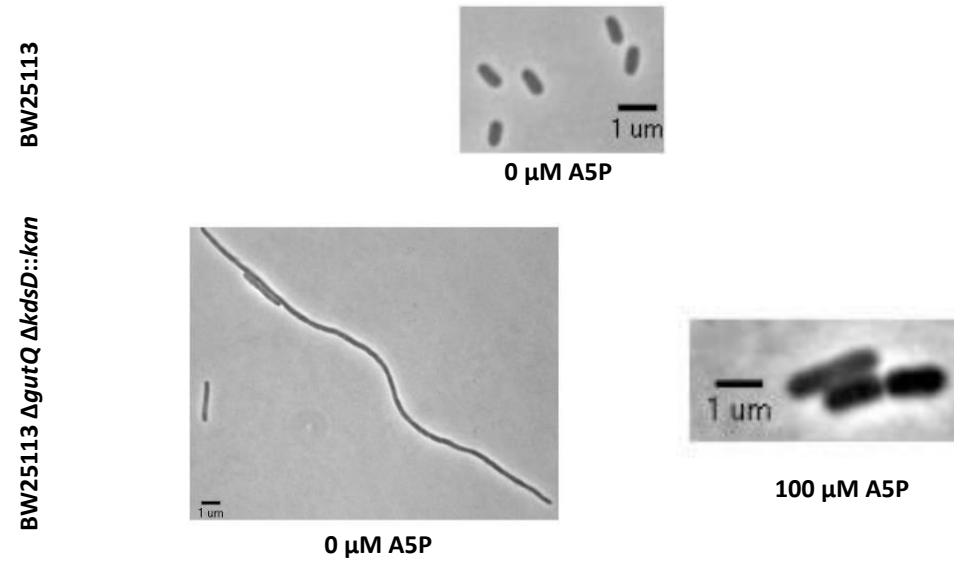



BW25113  $\Delta gutQ \Delta kdsD \Delta rbsK::P_{tac}-fsaA^{A129S}$

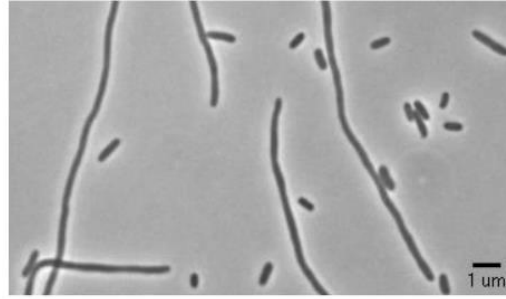

0  $\mu$ M A5P

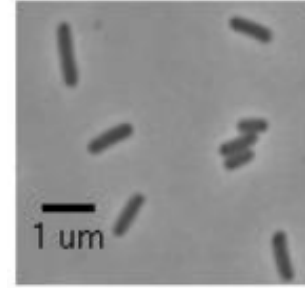

100  $\mu$ M GoA
